# Supplementary material for: Hyperoxia Induces Phenotypic Transition of Pulmonary Arterial Smooth Muscle Cells via PI3K/AKT Activation
Source: Research Square preprint supplement (doi:10.21203/rs.3.rs-7400898/v1), 2025-09-26
Supplement: Supplementary file 1 [file 4f145cdb93b9e24774392274.xlsx]

## Sheet: mechanism
	filename	Protein	PVDF		filename	Protein	PVDF		filename	Protein	PVDF
target protein	QSS-SMA-0109-1 2025.01.20_12.33.32_Ch+Marker	SMA			QSS-SMA-2 2025.02.17_15.17.28_Ch+Marker	SMA			QSS-SMA 2025.01.17_15.44.04_Ch+Marker	SMA
internal control	QSS-BA-0109-2 2025.01.18_15.47.47_Ch+Marker	B-A			QSS-BA-0217-2.1 2025.02.18_13.35.45_Ch+Marker	B-A			QSS-BA-2.1 2025.01.17_15.35.03_Ch+Marker	B-A
target protein	QSS-PA-1.2 2025.02.11_13.35.02_Ch+Marker	P-AKT			QSS-PA-2.2 2025.03.08_13.51.56_Ch+Marker	P-AKT			QSS-PA-1.3 2025.03.06_14.22.11_Ch+Marker	P-AKT
target protein	QSS-A-0211-PA.1.4 2025.03.17_14.46.01_Ch+Marker	AKT			QSS-A-0308-2.3 2025.03.15_13.20.02_Ch+Marker	AKT			QSS-A-0306-2.2 2025.03.07_13.33.15_Ch+Marker	AKT			QSS-AKT-0217-1 2025.02.18_13.28.19_Ch+Marker	AKT
internal control	QSS-BT-0212-1.1 2025.02.13_14.46.13_Ch+Marker	B-T			QSS-BT-0308-A.3.2 2025.03.17_14.03.14_Ch+Marker	B-A			QSS-BT-0306-A.2.2 2025.03.08_14.05.42_Ch+Marker	B-T			QSS-BA-0217-2 2025.02.19_14.03.57_Ch+Marker	B-A
target protein	QSS-OPN-2 2025.01.14_15.16.13_Ch+Marker	OPN			QSS-OPN-0109-1.1 2025.01.18_15.35.05_Ch+Marker	OPN			QSS-OPN-0117-3 2025.01.18_15.53.16_Ch+Marker	OPN			QSS-OPN-1.3-7-3 2025.01.16_15.43.35_Ch+Marker	OPN
internal control	QSS-BA-1.14-1 2025.01.15_16.07.12_Ch+Marker	B-A			QSS-BA-0109-2.1 2025.01.20_12.41.36_Ch+Marker	B-A			QSS-BA-1.2 2025.01.17_15.32.37_Ch+Marker	B-A			QSS-BA-1.3-7-1 2025.01.16_15.47.08_Ch+Marker	B-A
target protein	QSS-SM22-1 2025.01.13_15.01.31_Ch+Marker	SM22			QSS-SM22-2 2025.01.15_15.50.43_Ch+Marker	SM22a			QSS-SM22-2 2025.01.14_15.07.08_Ch+Marker	sm22a			QSS-SM22-1 2025.01.17_15.48.51_Ch+Marker	sm22a
internal control	QSS-BA-2 2025.01.13_15.05.45_Ch+Marker	B-A			QSS-BA-5.1 2025.01.15_16.08.52_Ch+Marker	B-A			QSS-BA-1.14-1 2025.01.15_16.07.12_Ch+Marker	B-A			QSS-BA-2 2025.01.17_15.33.59_Ch+Marker	B-A
target protein	QSS-MMP-1 2025.02.17_14.20.02_Ch+Marker	MMP-2			QSS-MM0121-1.1 2025.01.22_15.02.56_Ch+Marker	MMP-2			QSS-MMP-1.2 2025.02.11_13.51.52_Ch+Marker	MMP-2			QSS-MMP-2.1 2025.02.17_14.16.47_Ch+Marker	MMP-2
internal control	QSS-BT-0217-3.1 2025.02.18+B638:H638_13.50.31_Ch+Marker	B-T			QSS-BT-0119-1 2025.01.21_15.41.06_Ch+Marker	B-T			QSS-BT-0211-1.2 2025.02.12_13.38.37_Ch+Marker	B-T
target protein	QSS-PP-2.1 2025.01.19_13.41.22_Ch+Marker	P-PI3K			QSS-PP-2.2 2025.01.21_15.12.41_Ch+Marker	P-PI3K			QSS-PP-2.1 2025.02.13_13.51.39_Ch+Marker	P-PI3K
internal control	QSS-BT-0119-1 2025.01.21_15.41.06_Ch+Marker	B-T			QSS-BA-1 2025.01.22_14.35.54_Ch+Marker	B-A			QSS-BA-0213-2.1 2025.02.14_14.25.09_Ch+Marker	B-A
target protein	QSS-CC3-2.2 2025.01.21_15.28.03_Ch+Marker	C-Caspase3			QSS-CC3-2.1 2025.02.11_13.25.42_Ch+Marker	C-Caspase3			QSS-CC3-2 2025.02.17_14.40.02_Ch+Marker	C-Caspase3
target protein	QSS-C3-2.2 2025.01.21_15.20.45_Ch+Marker	Caspase3			QSS-C3-1.2 2025.02.11_13.44.33_Ch+Marker	Caspase3			QSS-C3-2 2025.02.17_14.34.53_Ch+Marker	Caspase3
target protein	QSS-P-1 2025.01.21_15.29.27_Ch+Marker	PI3K			QSS-P-0306-1.3 2025.03.07_13.27.30_Ch+Marker	PI3K			QSS-P-0306-2.2 2025.03.07_13.21.21_Ch+Marker	PI3K			QSS-P-0222-2 2025.02.24_14.05.48_Ch+Marker	PI3K
internal control	QSS-BA-0121-1 2025.01.22_14.38.51_Ch+Marker	B-A			QSS-BT-0306-A.2.1 2025.03.08_14.03.40_Ch+Marker	B-T			QSS-BT-0306-A.1.1 2025.03.08_14.01.16_Ch+Marker	B-T			QSS-BA-1.1 2025.02.22_10.32.43_Ch+Marker	B-A
target protein	QSS-BCL-1 2025.03.03_15.07.03_Ch+Marker	BCL-2			QSS-BCL-3 2025.01.17_15.27.45_Ch+Marker	BCL-2			QSS-BCL-3 2025.01.15_16.26.15_Ch+Marker	BCL-2			QSS-BCL-3 2025.01.14_15.39.06_Ch+Marker	BCL-2			QSS-BT-0308-A.3.3 2025.03.17_14.04.41_Ch+Marker	B-A
target protein	QSS-BAX-0303-2.1 2025.03.04_15.25.59_Ch+Marker	BAX			QSS-BAX-1.1 2025.01.17_15.11.06_Ch+Marker	BAX			QSS-BAX-2 2025.01.15_16.21.22_Ch+Marker	BAX			QSS-BAX-2 2025.01.13_15.33.49_Ch+Marker	BAX			QSS-BAX-0303-1.3 2025.03.04_15.22.28_Ch+Marker	BAX
Note: Some target proteins listed in the table exhibit molecular weights similar to the internal control. As the membrane was stripped and re-probed with a second antibody, they correspond to the same band.

## Sheet: phenotype
	filename	Protein	PVDF		filename	Protein	PVDF		filename	Protein	PVDF		filename	Protein	PVDF
target protein	QSS-MMP-(6-24)-1.1 2025.02.19_14.15.46_Ch+Marker	MMP-2			QSS-MMP-(6-24)-1.3 2025.02.20_15.26.01_Ch+Marker	MMP-2			QSS-MMP-(6-24)-1 2025.02.22_10.40.37_Ch+Marker	MMP-2
internal control	QSS-BA-0219(6-24)-2.1 2025.02.20_14.10.33_Ch+Marker	B-A			QSS-BA-0220(6-24)-M-1.2 2025.02.21_14.17.39_Ch+Marker	B-A			QSS-BT-0222(6-24)-M-3 2025.02.25_14.46.05_Ch+Marker	B-A
target protein	QSS-OPN-(6-24)-1.1 2025.02.19_14.29.32_Ch+Marker	OPN			QSS-OPN-(6-24)-2 2025.02.20_15.35.32_Ch+Marker	OPN			QSS-OPN(6-24)-3 2025.02.21_15.18.04_Ch+Marker	OPN			QSS-OPN-0222(6-24) 2025.02.24_14.33.40_Ch+Marker	OPN
internal control	QSS-BA-0219(6-24)-O-8.1 2025.02.21_14.58.53_Ch+Marker	B-A			QSS-BA-0220(6-24)-O-2.1 2025.02.21_14.19.18_Ch+Marker	B-A			QSS-BA-0221(6-24)-O-1 2025.02.22_11.06.31_Ch+Marker	B-A			QSS-BT-0222(6-24)-O-1 2025.02.25_14.36.48_Ch+Marker	B-A
target protein	QSS-SM22-(6-24)-1.1 2025.02.20_15.39.23_Ch+Marker	sm22a			QSS-SM22(6-24)-2.2 2025.02.27_12.29.39_Ch+Marker	sm22a			QSS-SM22-(6-24)-1.1 2025.03.06_15.16.01_Ch+Marker	sm22a			QSS-SM22(6-24)-2.1 2025.03.04_14.14.13_Ch+Marker	sm22a
internal control	QSS-BA-0220(6-24)-M-1.1 2025.02.21_14.15.38_Ch+Marker	B-A			QSS-BA-0227-4.2 2025.03.02_15.47.55_Ch+Marker	B-A			QSS-BA-0306(6-24)-S.1.3 2025.03.07_13.38.22_Ch+Marker	B-A			QSS-BA(6-24)-0304-O.1.1 2025.03.05_14.05.16_Ch+Marker	B-T
target protein	QSS-SMA-(6-24)-2 2025.03.06_15.09.21_Ch+Marker	SMA			QSS-SMA-(6-24)-1 2025.02.22_10.44.08_Ch+Marker	SMA			QSS-SMA-(6-24)-2 2025.02.20_15.31.40_Ch+Marker	SMA
internal control	QSS-BA-0306(6-24)-S.1.3 2025.03.07_13.38.22_Ch+Marker	B-A			QSS-BT-0222(6-24)-S-3 2025.02.25_14.34.25_Ch+Marker	B-A			QSS-BA-0220(6-24)-S-3.1 2025.02.21_14.23.11_Ch+Marker	B-A
